# Supplementary material for: Attenuating Effects of Dieckol on Hypertensive Nephropathy in Spontaneously Hypertensive Rats
Source: MDPI journal article supplement (doi:10.3390/ijms22084230), 2021-04-19
Supplement: s1 [file s1]

## Supplementary tables

Table S1. List of primer for quantitative polymerase chain reaction

| Gene          |         | Primer                            |
|---------------|---------|-----------------------------------|
| <i>Tgfb</i>   | Forward | 5'– GAGCCCTGGATACCAACTACTG –3'    |
|               | Reverse | 5'– AACCCAGGTCCTTCCTAAAGTC –3'    |
| <i>Smad2</i>  | Forward | 5'– GAACTCGGAGAGGTTCTGCTTA –3'    |
|               | Reverse | 5'– CTCCCCCTTCCTATATGCCTTCT –3'   |
| <i>Smad3</i>  | Forward | 5'– GGGGCTCTGTACATACCTTGAG –3'    |
|               | Reverse | 5'– AGAAACACTGGCACTCTGACAA –3'    |
| <i>AT1R</i>   | Forward | 5'– TAGCCAAAGGAAGAGTCAGGAG –3'    |
|               | Reverse | 5'– GGAACATAGCAAAGGGAGACTG –3'    |
| <i>Snail2</i> | Forward | 5'– GGCCTTTCTCCTCTTACTGGAT –3'    |
|               | Reverse | 5'– TGTGATCCTTGGATGAAGTGTC –3'    |
| <i>Actb</i>   | Forward | 5' – ACAAAGCTGTTCA GTGTCTCCA – 3' |
|               | Reverse | 5' – CTCCGTTTCCAGAATACACACA – 3'  |

**sTable 2. List of Antibodies for Western blotting,**

| <b>Antibody name (clone)</b> | <b>Company</b>           | <b>Cat. No.</b> | <b>Antibody dilution</b> |
|------------------------------|--------------------------|-----------------|--------------------------|
| $\beta$ -actin (C4)          | Santa cruz Biotechnology | sc-47778        | 1:500                    |
| TGF- $\beta$ (9016)          | Abcam                    | Ab64715         | 1:500                    |
| pSMAD2/3 (D27F4)             | Cell signaling           | 8828            | 1:1,000                  |
| SMAD2/3 (D7G7)               | Cell signaling           | 8685            | 1:1,000                  |
| AGTR1                        | Invitrogen               | PA5-20812       | 1:1,000                  |

## Supplementary figure

sFigure 1. Comparative analysis of ECE and DK administration on the reduction of expression of E-cadherin in the kidney of SHRs

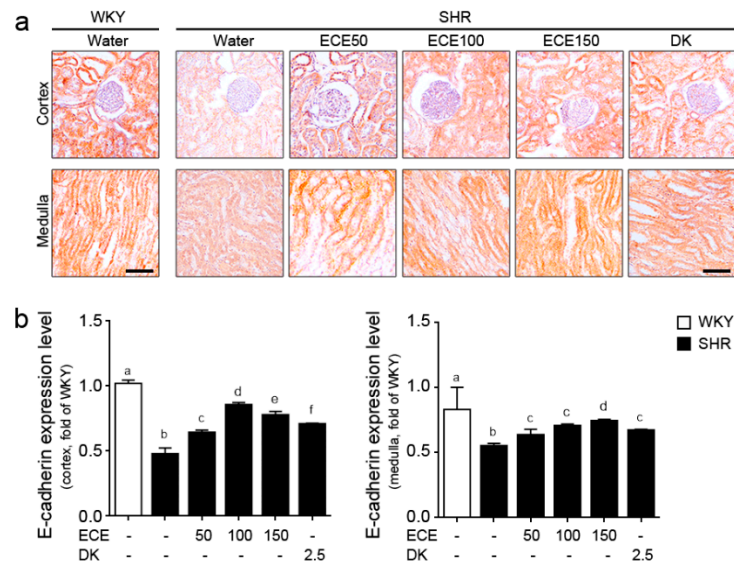

(a) E-cadherin protein expression level in cortex area, and in medulla of kidney were measured by immunohistochemistry and (b) the protein levels were quantified by Image J software. Scale bar = 50  $\mu$ m. Three doses of ECE (50 mg/kg/day, 100 mg/kg/day and 150 mg/kg/day) was oral administrated for 4 weeks and 2.5 mg/kg/day of DK also oral administrated for 4 weeks. Means denoted by a different letter indicate significant differences between groups ( $p < 0.05$ ). ECE, Ecklonia cava extract; DK, dieckol.
